# Supplementary material for: Performance comparison of three DNA extraction kits on human whole-exome data from formalin-fixed paraffin-embedded normal and tumor samples
Source: PubMed Central journal article supplement (PMC5886566; doi:10.1371/journal.pone.0195471), 2018-04-05
Supplement: pone.0195471.s001.pdf [file pone.0195471.s001.pdf]

Performance comparison of three dna extraction  
kits on human whole-exome formalin-fixed  
paraffin-embedded samples  
S1 supplementary table

2018

**S1 Table. Samples description.** FFPE and FF samples were ordered from company AMS BIOTECHNOLOGY EUROPE Ltd. We included tissues from two different organs (liver and colon). For each tissue, all samples come from the same individual and include both normal and tumor samples from fresh-frozen and formalin-fixed, paraffin-embedded tissues.

| <b>Sample</b> | <b>Tissue source</b> | <b>Extraction method</b> | <b>FF/FFPE</b> |
|---------------|----------------------|--------------------------|----------------|
| B00GXDN       | liver tumoral        | GeneRead                 | FFPE           |
| B00GXDO       | liver tumoral        | GeneRead                 | FFPE           |
| B00GXDP       | liver tumoral        | GeneRead                 | FFPE           |
| B00GXDQ       | liver normal         | GeneRead                 | FFPE           |
| B00GXDR       | liver normal         | GeneRead                 | FFPE           |
| B00GXDS       | liver normal         | GeneRead                 | FFPE           |
| B00GXHK       | colon tumoral        | GeneRead                 | FFPE           |
| B00GXHL       | colon tumoral        | GeneRead                 | FFPE           |
| B00GXHH       | colon normal         | GeneRead                 | FFPE           |
| B00GXHI       | colon normal         | GeneRead                 | FFPE           |
| B00GXCQ       | liver tumoral        | QIAamp DNA FFPE          | FFPE           |
| B00GXCR       | liver tumoral        | QIAamp DNA FFPE          | FFPE           |
| B00GXCS       | liver normal         | QIAamp DNA FFPE          | FFPE           |
| B00GXCT       | liver normal         | QIAamp DNA FFPE          | FFPE           |
| B00GXKT       | colon tumoral        | QIAamp DNA FFPE          | FFPE           |
| B00GXKU       | colon tumoral        | QIAamp DNA FFPE          | FFPE           |
| B00GXKW       | colon normal         | QIAamp DNA FFPE          | FFPE           |
| B00GXKX       | colon normal         | QIAamp DNA FFPE          | FFPE           |
| B00GXDH       | liver tumoral        | QIAamp DNAMicro          | FF             |
| B00GXDI       | liver tumoral        | QIAamp DNAMicro          | FF             |
| B00GXDL       | liver normal         | QIAamp DNAMicro          | FF             |
| B00GXDM       | liver normal         | QIAamp DNAMicro          | FF             |
| B00GXJ0       | colon tumoral        | QIAamp DNAMicro          | FF             |
| B00GXJ1       | colon tumoral        | QIAamp DNAMicro          | FF             |
| B00GXJ3       | colon normal         | QIAamp DNAMicro          | FF             |
| B00GXJ4       | colon normal         | QIAamp DNAMicro          | FF             |
| B00GXL9       | colon tumoral        | Maxwell frozen tissue    | FF             |
| B00GXLB       | colon tumoral        | Maxwell frozen tissue    | FF             |
| B00GXLE       | colon normal         | Maxwell frozen tissue    | FF             |
| B00GXLF       | colon normal         | Maxwell frozen tissue    | FF             |
| B00GXLH       | liver tumoral        | Maxwell frozen tissue    | FF             |
| B00GXLJ       | liver tumoral        | Maxwell frozen tissue    | FF             |
| B00GXLN       | liver normal         | Maxwell frozen tissue    | FF             |
| B00GXLO       | liver normal         | Maxwell frozen tissue    | FF             |
| B00GXLQ       | colon tumoral        | Maxwell FFPE             | FFPE           |
| B00GXLR       | colon tumoral        | Maxwell FFPE             | FFPE           |
| B00GXLU       | colon normal         | Maxwell FFPE             | FFPE           |
| B00GXLV       | colon normal         | Maxwell FFPE             | FFPE           |
| B00GXLY       | liver tumoral        | Maxwell FFPE             | FFPE           |
| B00GXLZ       | liver tumoral        | Maxwell FFPE             | FFPE           |
| B00GXM2       | liver normal         | Maxwell FFPE             | FFPE           |
| B00GXM5       | liver normal         | Maxwell FFPE             | FFPE           |
