# Supplementary material for: Performance comparison of three DNA extraction kits on human whole-exome data from formalin-fixed paraffin-embedded normal and tumor samples
Source: PubMed Central journal article supplement (PMC5886566; doi:10.1371/journal.pone.0195471), 2018-04-05
Supplement: pone.0195471.s002.pdf [file pone.0195471.s002.pdf]

Performance comparison of three dna extraction  
kits on human whole-exome formalin-fixed  
paraffin-embedded samples  
Supplementary table S2

2018

**S2 Table. FF and FFPE sample pairs used for the analysis.** The pair 26 was not used in the analysis due to a low number of reads after mapping to the human genome in one of the samples (B00GXLO, nb reads < 80M).

| pair ID | FF      |                  | FFPE    |                    |
|---------|---------|------------------|---------|--------------------|
|         | barcode | Sample type      | barcode | Sample type        |
| 1       | B00GXDH | FF liver tumoral | B00GXCQ | FFPE liver tumoral |
| 2       | B00GXDI | FF liver tumoral | B00GXCR | FFPE liver tumoral |
| 3       | B00GXDL | FF liver normal  | B00GXCS | FFPE liver normal  |
| 4       | B00GXDM | FF liver normal  | B00GXCT | FFPE liver normal  |
| 5       | B00GXJ0 | FF colon tumoral | B00GXKT | FFPE colon tumoral |
| 6       | B00GXJ1 | FF colon tumoral | B00GXKU | FFPE colon tumoral |
| 7       | B00GXJ3 | FF colon normal  | B00GXKW | FFPE colon normal  |
| 8       | B00GXJ4 | FF colon normal  | B00GXKX | FFPE colon normal  |
| 9       | B00GXDH | FF liver tumoral | B00GXDN | FFPE liver tumoral |
| 10      | B00GXDI | FF liver tumoral | B00GXDO | FFPE liver tumoral |
| 11      | B00GXDI | FF liver tumoral | B00GXDP | FFPE liver tumoral |
| 12      | B00GXDL | FF liver normal  | B00GXDQ | FFPE liver normal  |
| 13      | B00GXDM | FF liver normal  | B00GXDR | FFPE liver normal  |
| 14      | B00GXDM | FF liver normal  | B00GXDS | FFPE liver normal  |
| 15      | B00GXJ0 | FF colon tumoral | B00GXHK | FFPE colon tumoral |
| 16      | B00GXJ1 | FF colon tumoral | B00GXHL | FFPE colon tumoral |
| 17      | B00GXJ3 | FF colon normal  | B00GXHH | FFPE colon normal  |
| 18      | B00GXJ4 | FF colon normal  | B00GXHI | FFPE colon normal  |
| 19      | B00GXL9 | FF colon tumoral | B00GXLQ | FFPE colon tumoral |
| 20      | B00GXLB | FF colon tumoral | B00GXLR | FFPE colon tumoral |
| 21      | B00GXLE | FF colon normal  | B00GXLU | FFPE colon normal  |
| 22      | B00GXLF | FF colon normal  | B00GXLV | FFPE colon normal  |
| 23      | B00GXLH | FF liver tumoral | B00GXLY | FFPE liver tumoral |
| 24      | B00GXLJ | FF liver tumoral | B00GXLZ | FFPE liver tumoral |
| 25      | B00GXLN | FF liver normal  | B00GXM2 | FFPE liver normal  |
| 26      | B00GXLO | FF liver normal  | B00GXM5 | FFPE liver normal  |
