# Supplementary material for: Performance comparison of three DNA extraction kits on human whole-exome data from formalin-fixed paraffin-embedded normal and tumor samples
Source: PubMed Central journal article supplement (PMC5886566; doi:10.1371/journal.pone.0195471), 2018-04-05
Supplement: pone.0195471.s003.pdf [file pone.0195471.s003.pdf]

Performance comparison of three dna extraction  
kits on human whole-exome formalin-fixed  
paraffin-embedded samples  
Supplementary table S3

2018

**S3 Table. Tumor specific SNVs counts and percentages.** Tissue: tissue source type; NbV FF N: Nb of unique variants in all FF normal samples; NbV FF TS: Nb of unique variants in all FF samples that are tumor specific; NbV FFPE N: Nb of unique variants in all FFPE normal samples; NbV FFPE TS: Nb of unique variants in all FFPE samples that are tumor specific; Nb CV: Nb of variants that are common between tumor specific variants for FF and FFPE samples; P FF: percentage of FF and FFPE common variants relative to the number of FF tumor specific variants ( $\text{Nb CV} / \text{NbV FF TS}$ ); P FFPE: percentage of FF and FFPE common variants relative to the number of FFPE tumor specific variants ( $\text{Nb CV} / \text{NbV FFPE TS}$ ).

| <b>Tissue</b> | <b>NbV FF N</b> | <b>NbV FF TS</b> | <b>NbV FFPE N</b> | <b>NbV FFPE TS</b> | <b>Nb CV</b> | <b>P FF</b> | <b>P FFPE</b> |
|---------------|-----------------|------------------|-------------------|--------------------|--------------|-------------|---------------|
| Liver         | 41903           | 394              | 42204             | 333                | 53           | 13%         | 16%           |
| Colon         | 41979           | 436              | 42183             | 458                | 165          | 38%         | 36%           |
